# Supplementary material for: Autistic People’s Perinatal Experiences II: A Survey of Childbirth and Postnatal Experiences
Source: J Autism Dev Disord. 2022 Apr 20;53(7):2749–63. doi: 10.1007/s10803-022-05484-4 (PMC10290578; doi:10.1007/s10803-022-05484-4)
Supplement: Supplementary file 2 — Supplementary file2 (DOCX 49 kb) ESM_2: Tables showing correlations between items on the survey [file 10803_2022_5484_MOESM2_ESM.docx]

**Correlations between survey questions**

Article title: Autistic people’s perinatal experiences II: a survey of childbirth and postnatal experiences

Journal: Journal of Autism and Developmental Disorders

Authors: Hampton, S., Allison, C., Baron-Cohen, S. & Holt, R.

Corresponding author: Sarah Hampton

**Supplementary Table 1** Polychoric correlations between birth questions

|  | 1 | 2 | 3 | 4 | 5 | 6 | 7 | 8 | 9 | 10 | 11 |
| --- | --- | --- | --- | --- | --- | --- | --- | --- | --- | --- | --- |
| 1. Overwhelmed by sensory input | 1.00 |  |  |  |  |  |  |  |  |  |  |
| 2. Aware of body’s signals during birth | -.28*** | 1.00 |  |  |  |  |  |  |  |  |  |
| 3. Had meltdown during birth | **.44***** | -.21** | 1.00 |  |  |  |  |  |  |  |  |
| 4. Had shutdown during birth | **.50***** | -.16* | .27*** | 1.00 |  |  |  |  |  |  |  |
| 5. Kept informed professionals of what was happening | **-.53***** | .22*** | **-.35***** | **-.42***** | 1.00 |  |  |  |  |  |  |
| 6. Professionals listened to my requests | **-.55***** | **.30***** | **-.36***** | **-.42***** | **.78***** | 1.00 |  |  |  |  |  |
| 7. Professionals had accurate understanding of what perceiving physically | **-.58***** | **.31***** | **-.38***** | **-.41***** | **.75***** | **.78***** | 1.00 |  |  |  |  |
| 8. Felt pressure to behave in a socially normative way | **.56***** | **-.32***** | .16** | **.36***** | **-.44***** | **-.47***** | **-.49***** | 1.00 |  |  |  |
| 9. Satisfaction with medical care received | **-.51***** | .26*** | **-.35***** | **-.45***** | **.78***** | **.85***** | **.68***** | **-.39***** | 1.00 |  |  |
| 10. Shared postnatal ward overwhelming | **.44***** | -.07 | .27*** | .24** | -.21** | -.21** | **-.32***** | .29*** | -.29** | 1.00 |  |
| 11. Satisfaction with services received during postnatal stay | **-.32***** | .21*** | -.18** | -.19** | .27*** | **.39***** | **.33***** | -.21*** | **.55***** | **-.47***** | 1.00 |

*Note.* Correlations ≥ .30 in bold

*p≤0.05

**p≤0.01

***p≤0.001

**Supplementary Table 2** Polychoric correlations between postnatal questions

|  | **1** | **2** | **3** | **4** | **5** | **6** | **7** | **8** | **9** | **10** | **11** | **12** | **13** | **14** | **15** | **16** | **17** | **18** | **19** | **20** | **21** | **22** | **23** |
| --- | --- | --- | --- | --- | --- | --- | --- | --- | --- | --- | --- | --- | --- | --- | --- | --- | --- | --- | --- | --- | --- | --- | --- |
| 1. Attended midwife appointments | 1.00 |  |  |  |  |  |  |  |  |  |  |  |  |  |  |  |  |  |  |  |  |  |  |
| 2. Attended health visitor appointments | **.56***** | 1.00 |  |  |  |  |  |  |  |  |  |  |  |  |  |  |  |  |  |  |  |  |  |
| 3. Attended 6 week check | **.72***** | **.58***** | 1.00 |  |  |  |  |  |  |  |  |  |  |  |  |  |  |  |  |  |  |  |  |
| 4. Attended 6-8 week check | **.42*** | **.61**** | **.58***** | 1.00 |  |  |  |  |  |  |  |  |  |  |  |  |  |  |  |  |  |  |  |
| 5. Seen the same professional at each appointment | -.06 | .08 | **.58** | **.33***** | 1.00 |  |  |  |  |  |  |  |  |  |  |  |  |  |  |  |  |  |  |
| 6. Seeing the same professional at each appointment is important | **-.27** | .01 | -.21 | -.19* | .28*** | 1.00 |  |  |  |  |  |  |  |  |  |  |  |  |  |  |  |  |  |
| 7. Stressful when professional not who expecting | -.14 | -.06 | -.14 | -.24 | -.03 | **.79***** | 1.00 |  |  |  |  |  |  |  |  |  |  |  |  |  |  |  |  |
| 8. Found home visits stressful | -.16 | -.22 | -.05 | -.16 | -.12 | **.30***** | **.52***** | 1.00 |  |  |  |  |  |  |  |  |  |  |  |  |  |  |  |
| 9. Professionals took concerns seriously | .01 | .16 | **.38***** | **.31*** | **.35***** | -.15* | **-.38***** | **-.39**** | 1.00 |  |  |  |  |  |  |  |  |  |  |  |  |  |  |
| 10. Professionals have treated me respectfully | .13 | .22* | .16 | .20 | .26*** | -.18* | **-.37***** | **-.44***** | **.78***** | 1.00 |  |  |  |  |  |  |  |  |  |  |  |  |  |
| 11. I have felt able to trust professionals | .02 | .29*** | .27** | .19 | .26*** | -.22*** | **-.43***** | **-.46***** | **.76***** | **.82***** | 1.00 |  |  |  |  |  |  |  |  |  |  |  |  |
| 12. Comfortable asking questions to professionals | -.03 | .25** | .22* | **.30*** | .29*** | -.28*** | **-.52***** | **-.47***** | **.83***** | **.82***** | **.80***** | 1.00 |  |  |  |  |  |  |  |  |  |  |  |
| 13. I have felt negatively judged by professionals | -.24 | -.28** | -.23* | **-.37*** | -.27*** | .24*** | **.43***** | **.50***** | **-.62***** | **-.70***** | **-.68***** | **-.59***** | 1.00 |  |  |  |  |  |  |  |  |  |  |
| 14. Received information on mental health | .16 | .18 | .21 | -.04 | .13* | -.19*** | **-.37***** | -.19* | **.50***** | **.50***** | **.55***** | **.58***** | **-.41***** | 1.00 |  |  |  |  |  |  |  |  |  |
| 15. Received information on looking after baby | .13 | .29* | .11 | .09 | .11* | -.13 | -.25*** | -.13 | **.42***** | **.36***** | **.33***** | **.46***** | -.18 | **.60***** | 1.00 |  |  |  |  |  |  |  |  |
| 16. Received information on interpreting baby’s cries | .11 | .26** | .16 | **.31*** | .09 | -.18* | -.26*** | -.13 | **.43***** | **.41***** | **.43***** | **.53***** | -.28*** | **.61***** | **.79***** | 1.00 |  |  |  |  |  |  |  |
| 17. Received information on play with baby | .13 | .15 | -.05 | .06 | .04 | -.08 | -.19* | -.14 | .28*** | .28*** | .22*** | **.33***** | -.10*** | **.56***** | **.88***** | **.77***** | 1.00 |  |  |  |  |  |  |
| 18. Satisfied how information presented | .09 | **.32**** | **.32*** | .29 | .21*** | -.25*** | **-.32***** | -.24*** | **.73***** | **.64***** | **.69***** | **.75***** | **-.46***** | **.69***** | **.67***** | **.70***** | **.59***** | 1.00 |  |  |  |  |  |
| 19. Satisfaction midwife appointments | .02 | .11 | .21 | .06 | **.32***** | -.27*** | **-.36**** | **-.44**** | **.67***** | **.66***** | **.76***** | **.69***** | **-.51***** | **.50***** | **.44***** | **.54***** | **.37***** | **.69***** | 1.00 |  |  |  |  |
| 20. Satisfaction health visitor appointments | .07 | **.58***** | .14 | **.43**** | .24*** | -.15 | -.24** | **-.38***** | **.51***** | **.68***** | **.67***** | **.65***** | **-.59***** | **.33***** | **.33***** | **.41***** | .24*** | **.58***** | **.58***** | 1.00 |  |  |  |
| 21. Satisfaction doctor appointments | .06 | .17 | .26 | .23 | .26** | -.20** | **-.32**** | -.19** | **.64***** | **.65***** | **.63***** | **.56***** | **-.43***** | **.42***** | **.32***** | **.37***** | .25** | **.60***** | **.59***** | **.58***** | 1.00 |  |  |
| 22. Difficult to attend drop-in clinics | -.04 | -.24* | -.19 | **-.50***** | -.08 | **.31***** | **.45**** | **.30***** | **-.36***** | **-.38***** | **-.31***** | **-.47***** | .29*** | -.19*** | -.20*** | -.24*** | -.15** | **-.34***** | -.13* | -.24*** | **-.35***** | 1.00 |  |
| 23. Difficult to attend parent and baby groups | -.18 | -.13 | -.24 | -.16 | .10 | **.34***** | **.52***** | **.54***** | **-.36***** | **-.32***** | **-.38***** | **-.45***** | **.38***** | **-.38***** | **-.31**** | -.21** | -.27*** | -.29*** | -.29*** | -.20** | -.25*** | **.58***** | 1.00 |

*Note.* Correlations ≥ .30 in bold

*p≤0.05

**p≤0.01

***p≤0.001

**Supplementary Table 3** Polychoric correlations between breastfeeding questions

|  | Had difficulties breastfeeding | Found it easy to access breastfeeding support | Satisfaction with breastfeeding support |
| --- | --- | --- | --- |
| Had difficulties breastfeeding | 1.00 |  |  |
| Found it easy to access breastfeeding support | **-.41***** | 1.00 |  |
| Satisfaction with breastfeeding support | **-.52***** | **.90***** | 1.00 |

*Note.* Correlations ≥ .30 in bold

***p≤0.001

**Supplementary Table 4** Polychoric correlations between postnatal support questions

|  | Partner | Family | Friends |
| --- | --- | --- | --- |
| Partner | 1.00 |  |  |
| Family | **.58***** | 1.00 |  |
| Friends | **.37***** | **.66***** | 1.00 |

*Note.* Correlations ≥ .30 in bold

***p≤0.001
